# Supplementary material
Source: PubMed Central journal article supplement (PMC2630089)
Supplement: 0810731105_0810731105SI.pdf [file 0810731105_0810731105SI.pdf]

# Supporting Information

Luo et al. 10.1073/pnas.0810731105

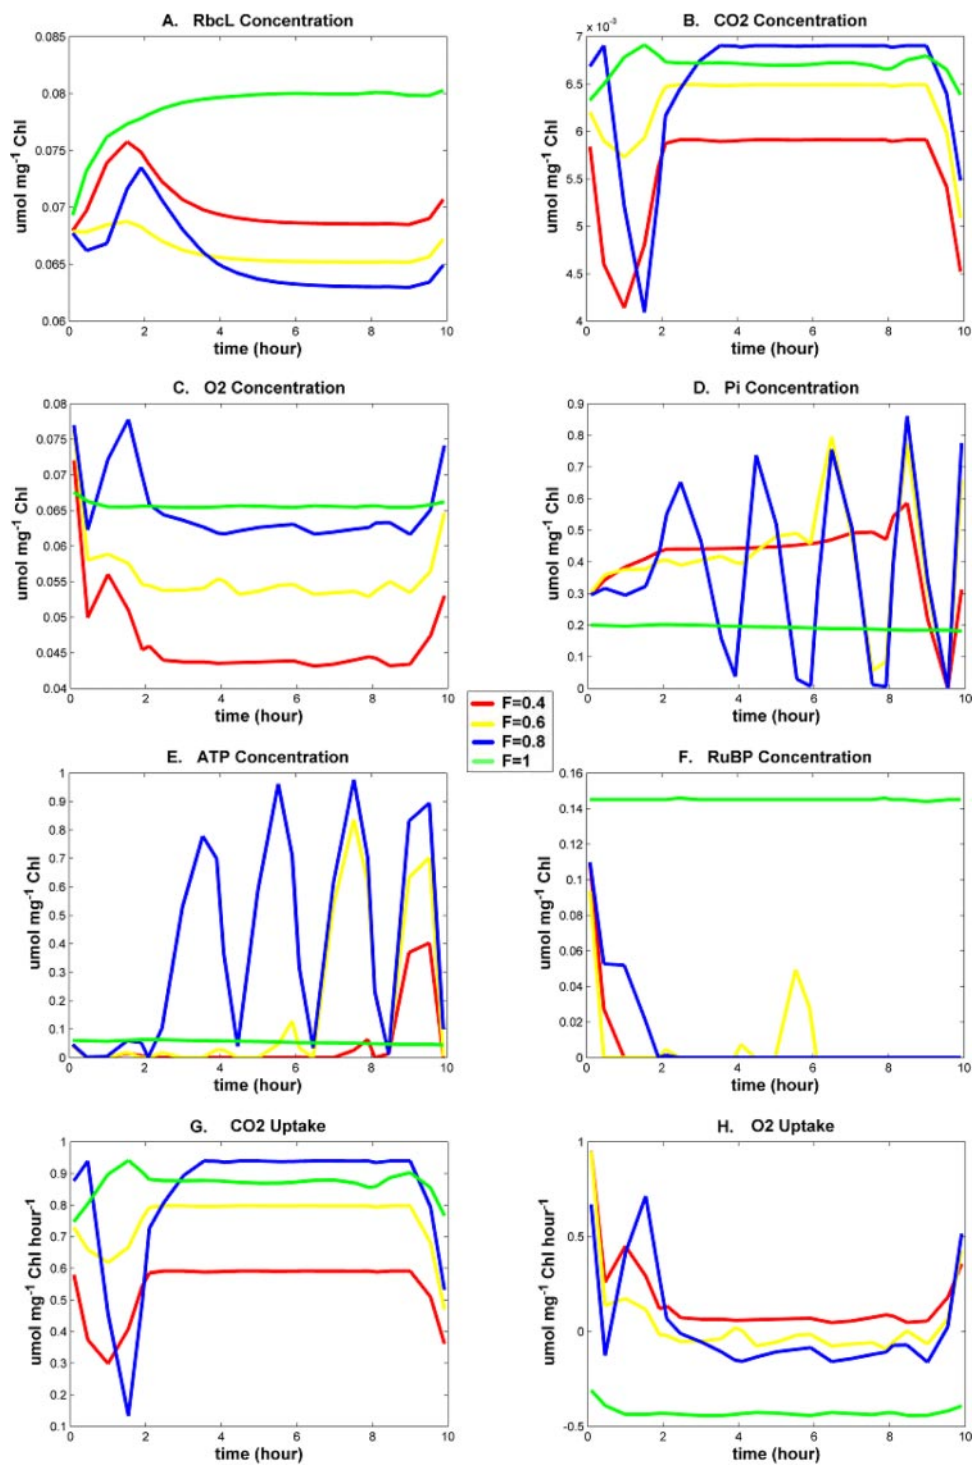

Fig. S1. Objective function is set as maximum PGA production rate of photosynthetic metabolism in the chloroplast of  $C_3$  plants by the Dynamic Flux Balance Analysis (DFBA) method in the different levels of water stress.  $F$  represents water stress. Green represents the normal condition ( $F = 1$ ), blue represents the mild ( $F = 0.8$ ), yellow represents the moderate ( $F = 0.6$ ), red represents the severe ( $0.4$ ).

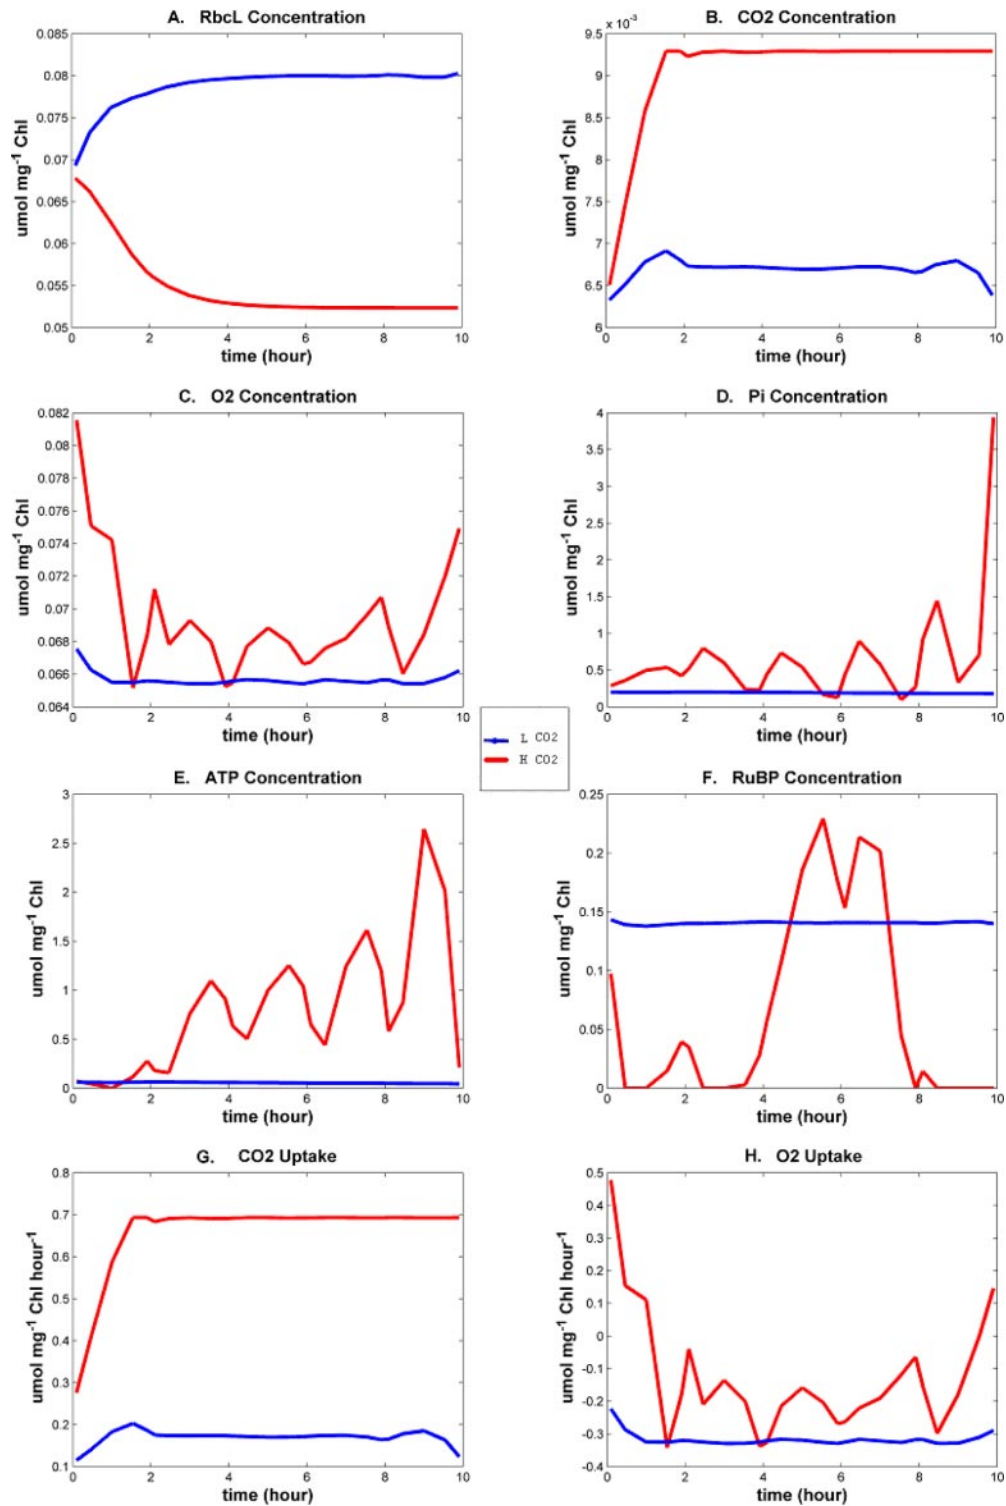

Fig. S2. Objective function is set as maximum PGA production rate of photosynthetic metabolism in the chloroplast of  $C_3$  plants by the DFBA method in the normal (blue) and double concentration of  $CO_2$  (red).

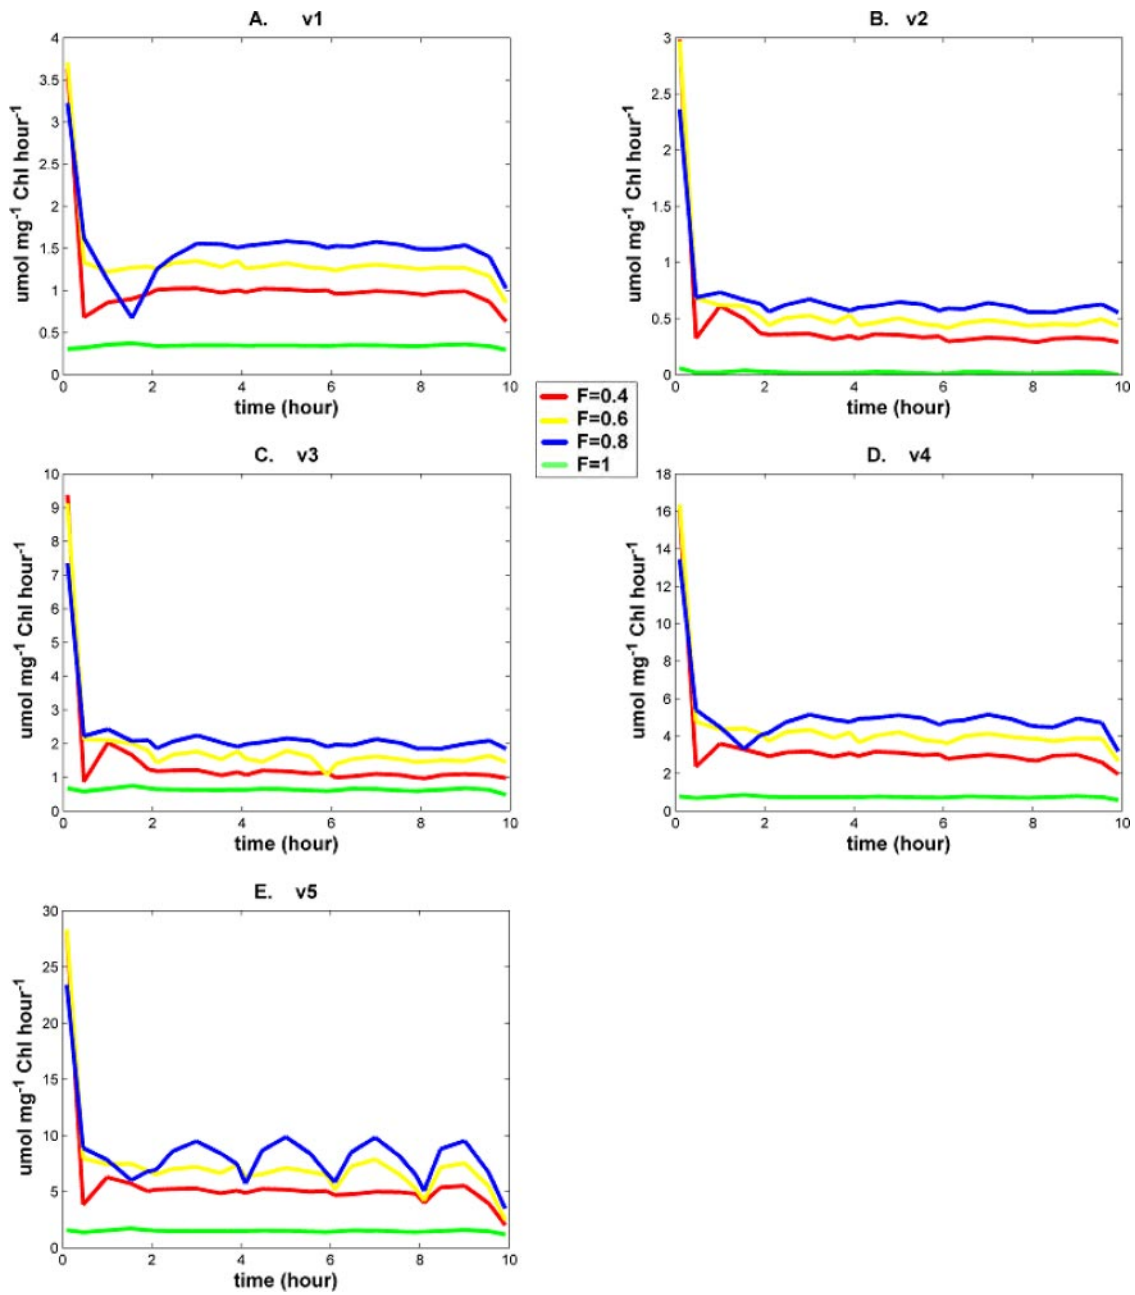

**Fig. S3.** Velocity of five fluxes under water deficit conditions. Objective function is set as maximum PGA production rate of photosynthetic metabolism in the chloroplast of  $C_3$  plants by the DFBA method.  $F$  represents water stress. Green represents the normal condition ( $F = 1$ ), blue represents the mild ( $F = 0.8$ ), yellow represents the moderate ( $F = 0.6$ ); red represents the severe (0.4).

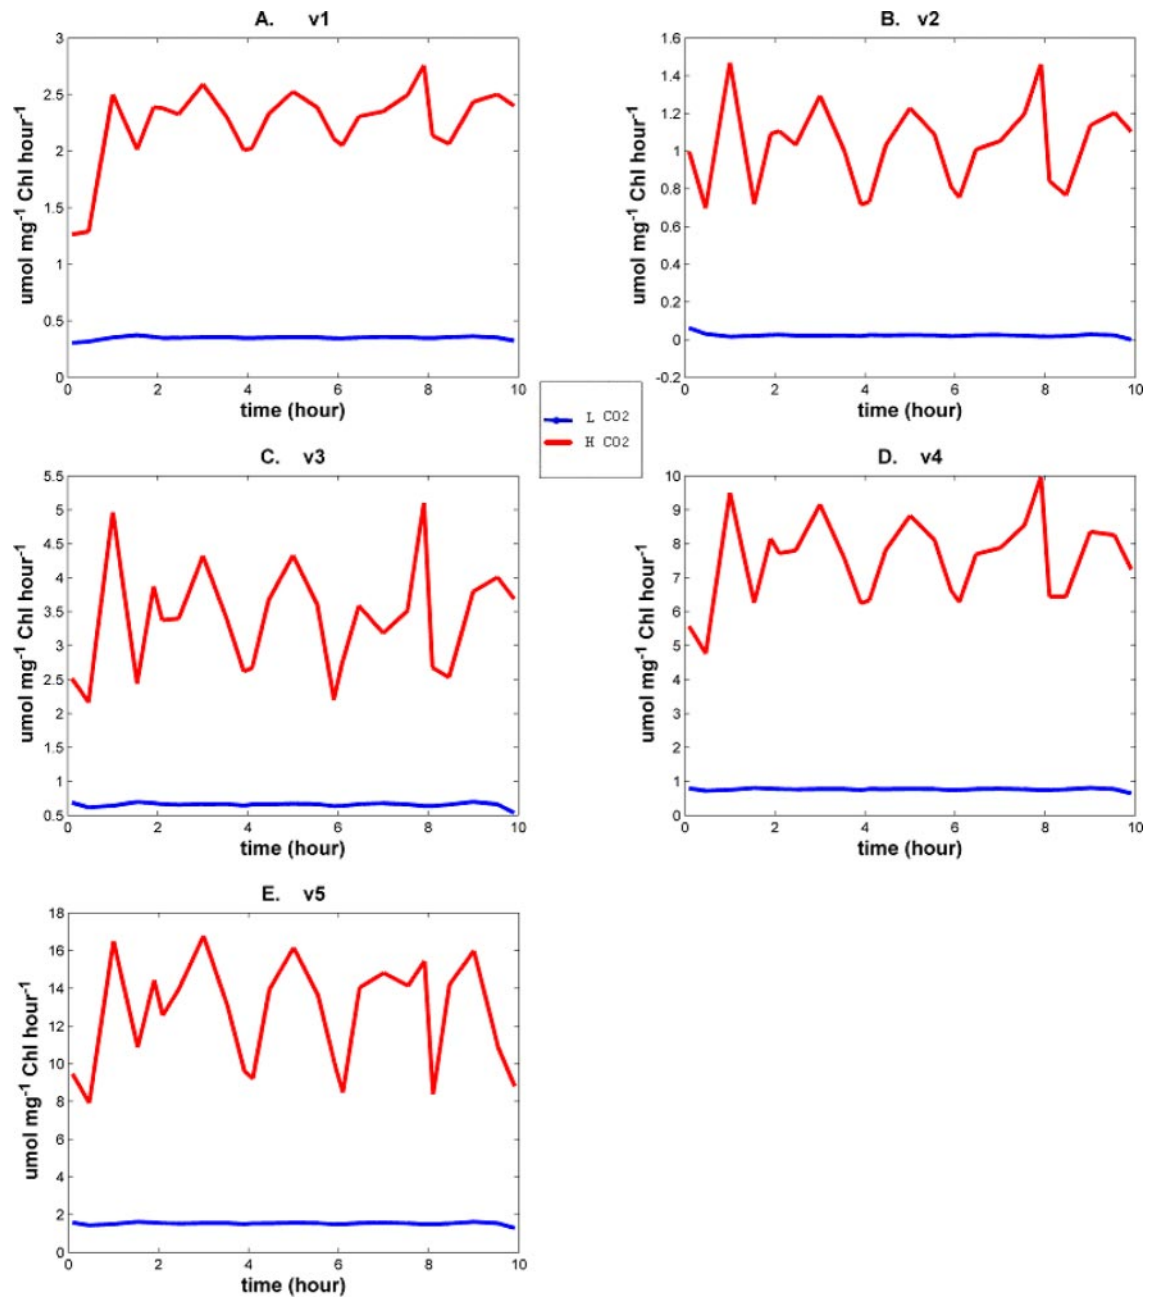

**Fig. S4.** Velocity of five fluxes under the double concentration of CO<sub>2</sub> condition. Objective function is set as maximum PGA production rate of photosynthetic metabolism in the chloroplast of C<sub>3</sub> plants by the DFBA method. Blue represents the normal condition, red represents double concentration of CO<sub>2</sub>.

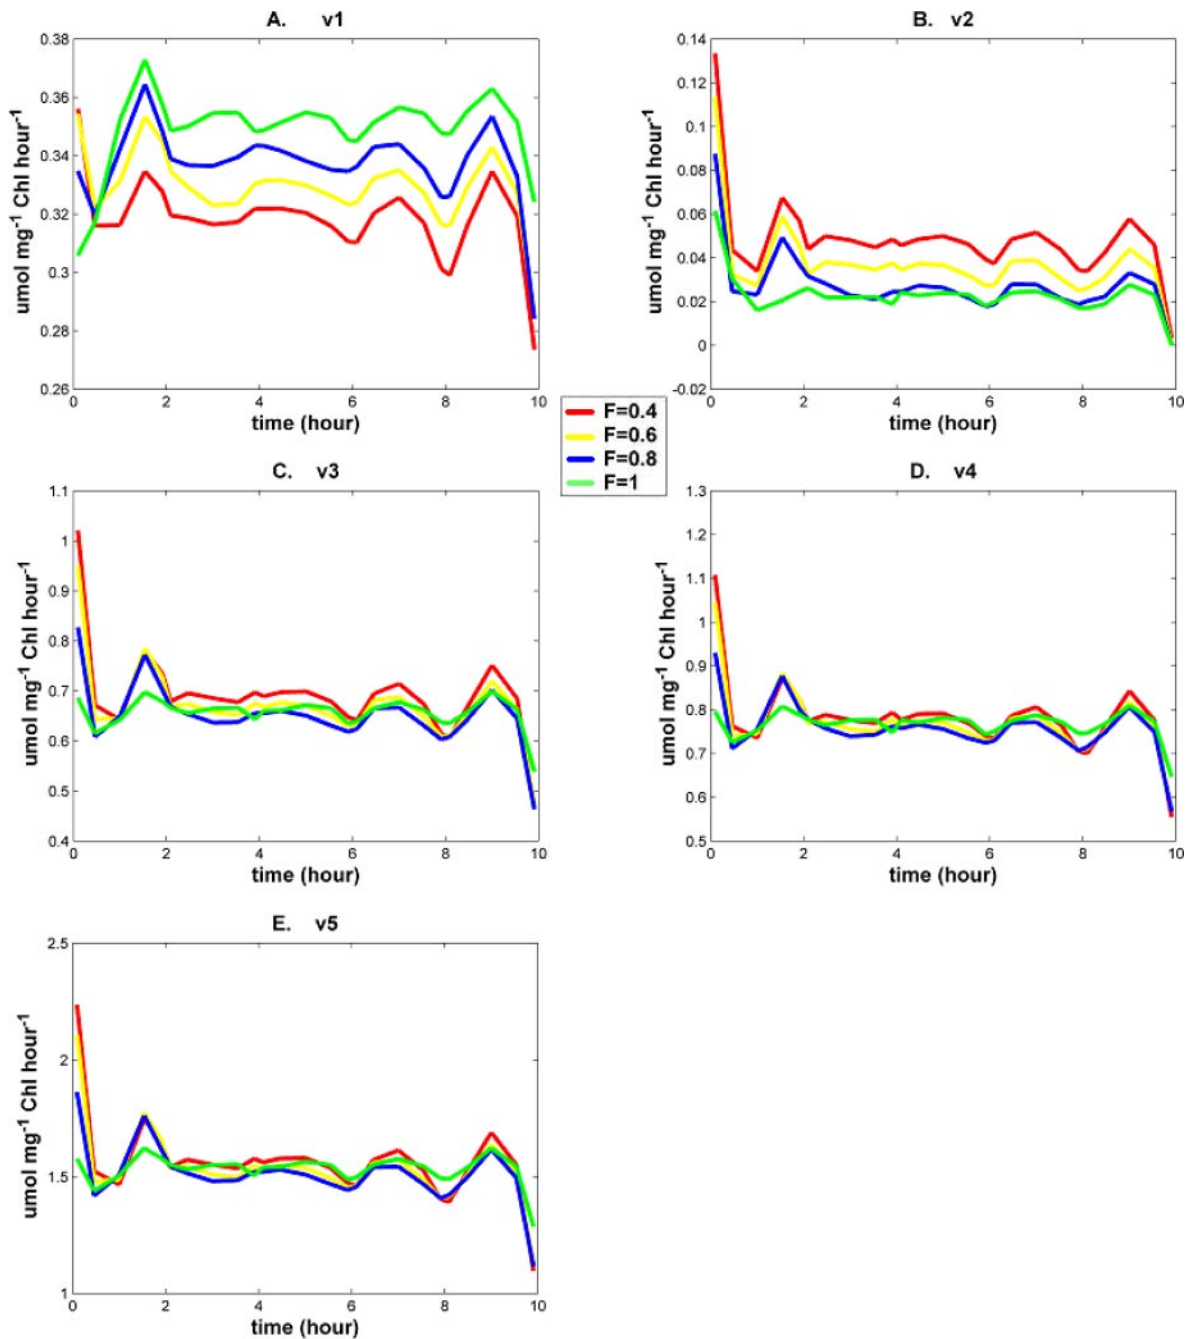

**Fig. S5.** Velocity of five fluxes under water deficit conditions. Objective function is set as minimum fluctuation of the profile of metabolites concentration of photosynthetic metabolism in the chloroplast of  $C_3$  plants by the M.DFBFA method.  $F$  represents water stress. Green represents the normal condition ( $F = 1$ ), blue represents the mild ( $F = 0.8$ ), yellow represents the moderate ( $F = 0.6$ ), red represents the severe ( $F = 0.4$ ).

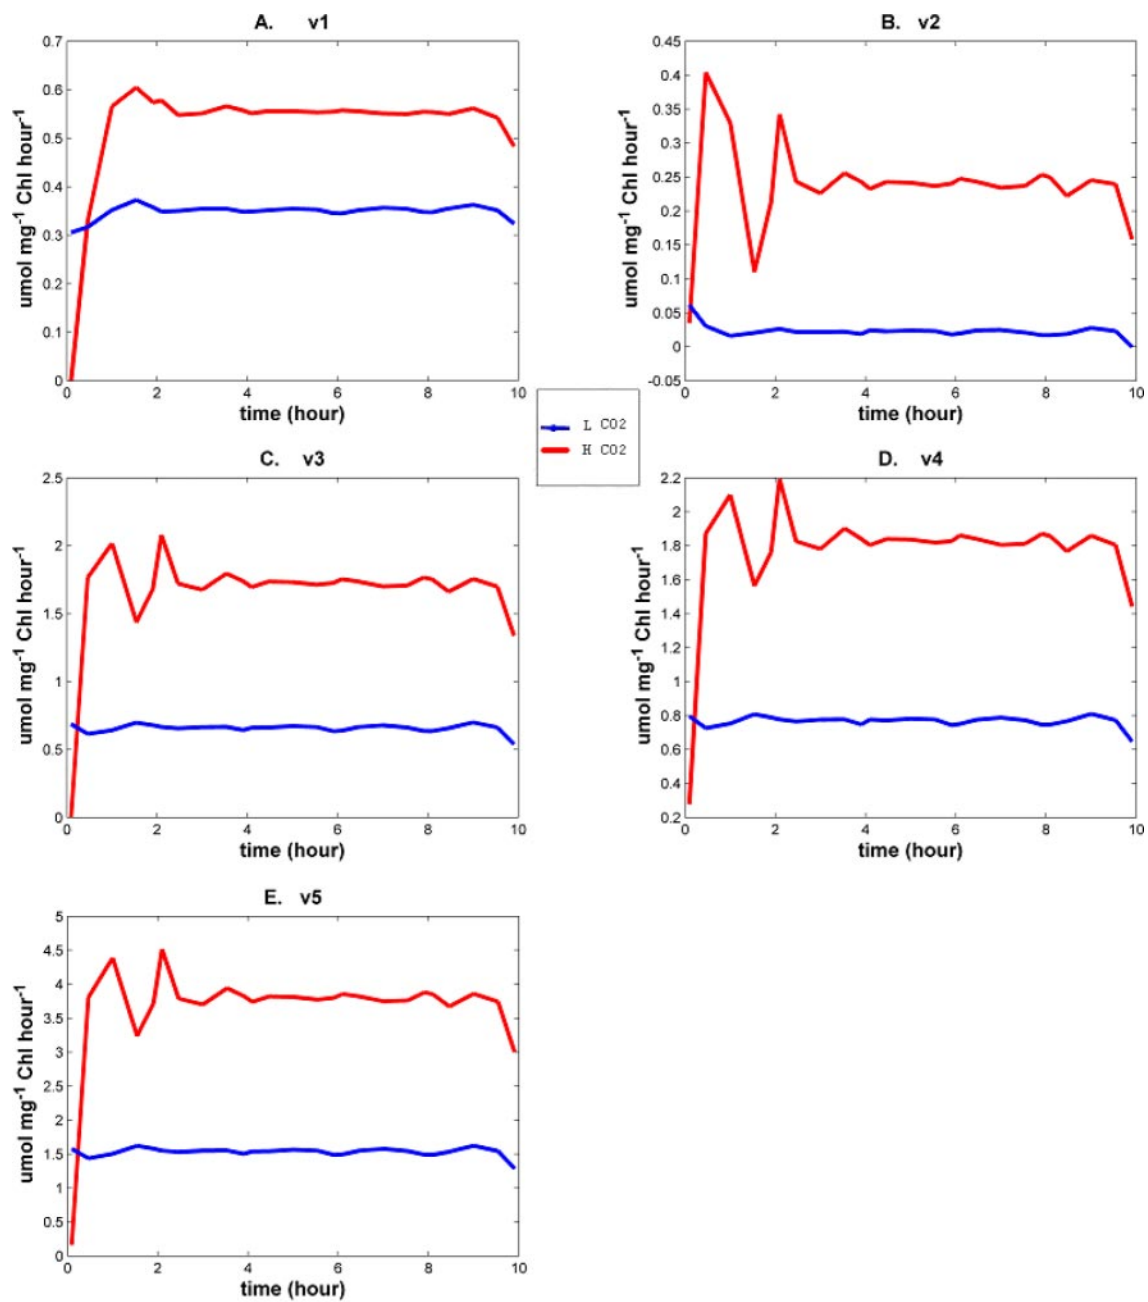

**Fig. S6.** Velocity of five fluxes under the double concentration of  $\text{CO}_2$  condition. Objective function is set as minimum fluctuation of the profile of metabolites concentration of photosynthetic metabolism in the chloroplast of  $\text{C}_3$  plants by the M.DFBA method. Blue represents the normal condition, red represents double concentration of  $\text{CO}_2$ .



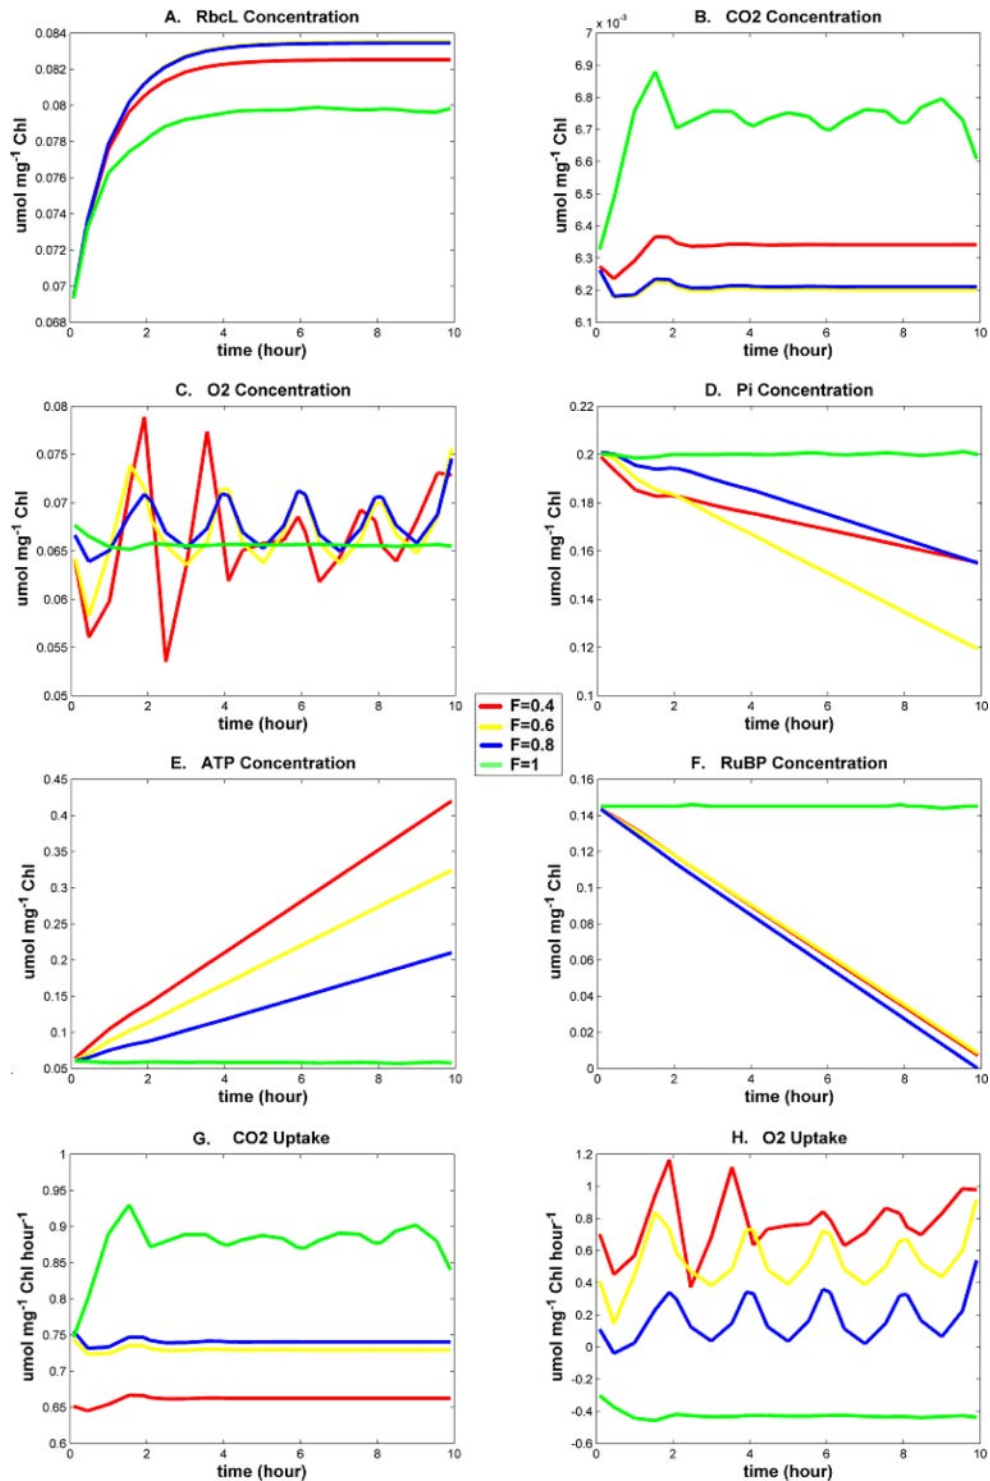

**Fig. S7.** Objective function is set as minimum fluctuation of the profile of the fluxes of photosynthetic metabolism in the chloroplast of  $C_3$  plants by the M.DFBA method in the different levels of water stress.  $F$  represents water stress. Green represents the normal condition ( $F = 1$ ), blue represents the mild ( $F = 0.8$ ), yellow represents the moderate ( $F = 0.6$ ); red represents the severe (0.4).

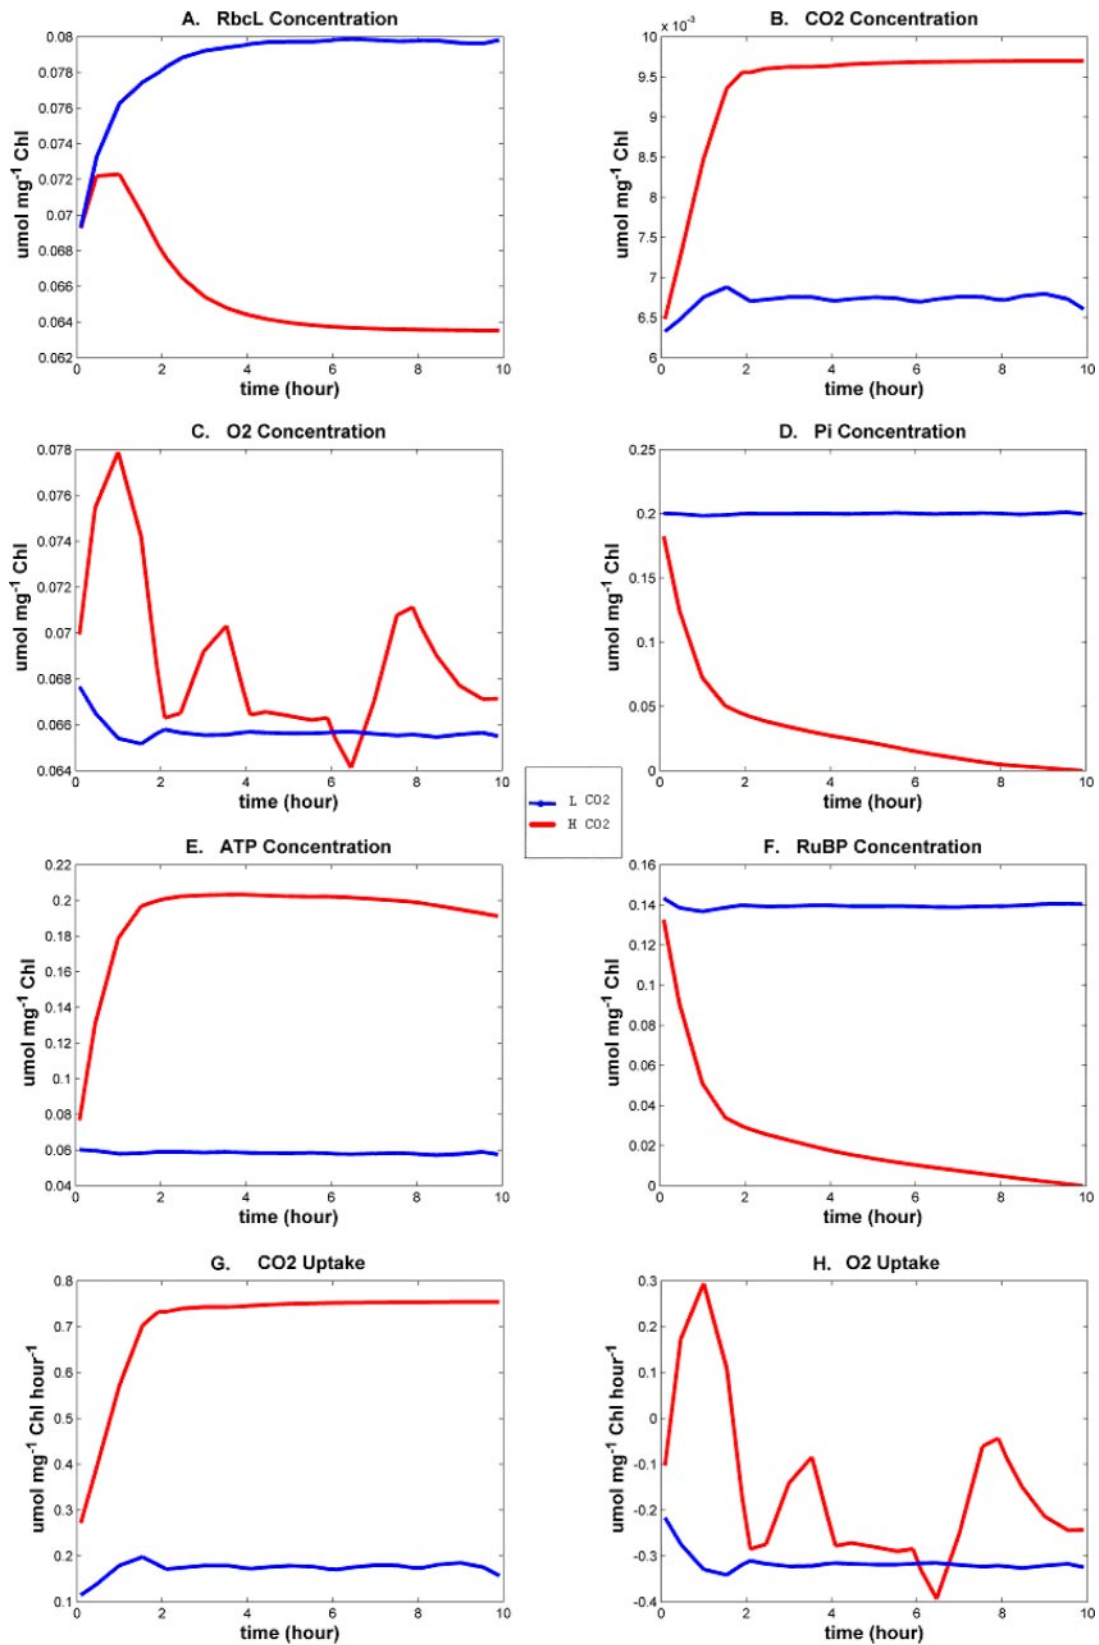

**Fig. S8.** Objective function is set as minimum fluctuation of the profile of the fluxes of photosynthetic metabolism in the chloroplast of  $C_3$  plants by the M\_DFBA method in the normal (blue) and double concentration of  $\text{CO}_2$  (red).



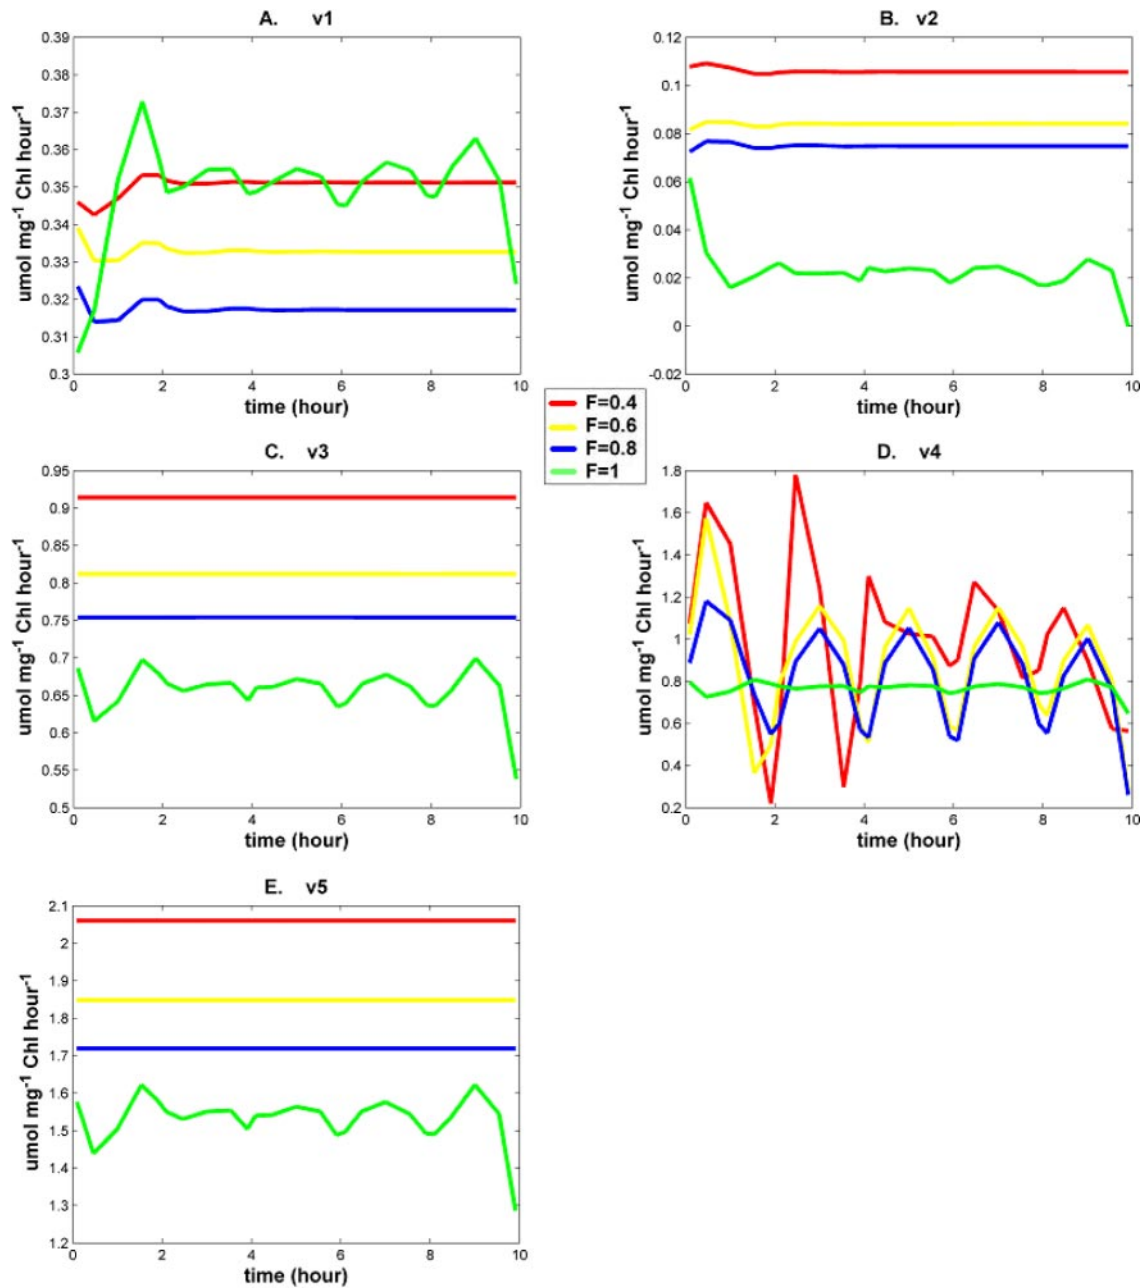

**Fig. S9.** Velocity of five fluxes under water deficit conditions. Objective function is set as minimum fluctuation of the profile of the fluxes of photosynthetic metabolism in the chloroplast of  $C_3$  plants by the M.DFBA method.  $F$  represents water stress. Green represents the normal condition ( $F = 1$ ), blue represents the mild ( $F = 0.8$ ), yellow represents the moderate ( $F = 0.6$ ), red represents the severe (0.4).

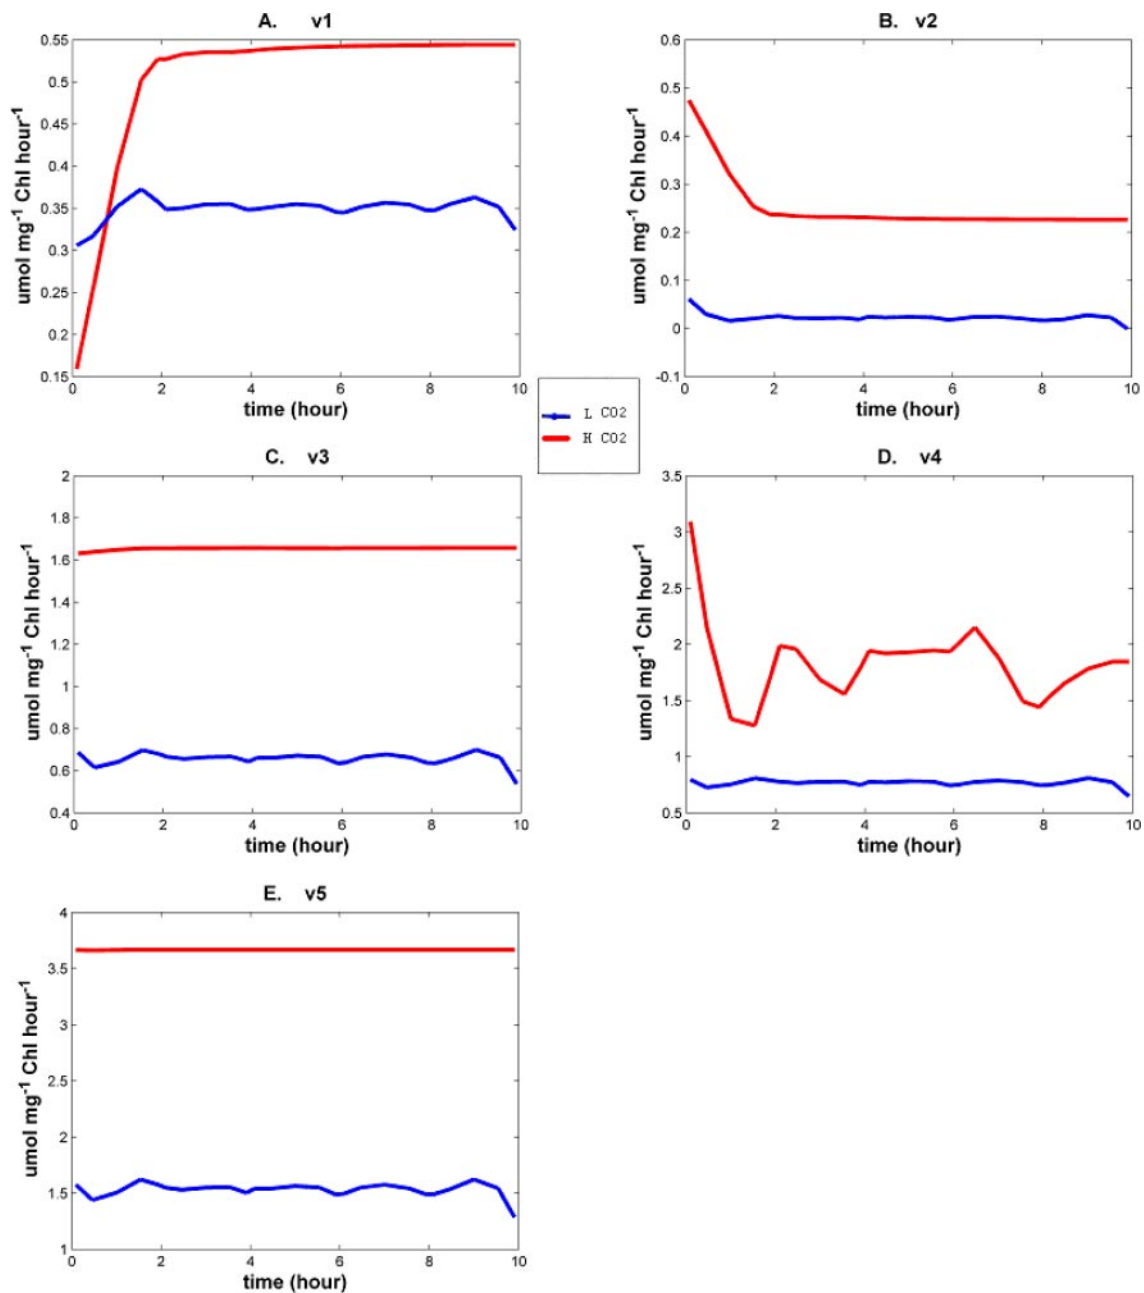

**Fig. S10.** Velocity of five fluxes under the double concentration of CO<sub>2</sub> condition. Objective function is set as minimum fluctuation of the profile of the fluxes of photosynthetic metabolism in the chloroplast of C<sub>3</sub> plants by the M\_DFBA method. Blue represents the normal condition, red represents double concentration of CO<sub>2</sub>.

**Table S1. Parameters for equations**

| Variable       | Note                                         | Value                                                                                 | Reference |
|----------------|----------------------------------------------|---------------------------------------------------------------------------------------|-----------|
| $x^{CO_2}$     | CO <sub>2</sub> concentration in chloroplast | $6.3 \cdot 10^{-3} \mu\text{mol} \cdot \text{mg}^{-1} \text{Chl}$                     | (1)       |
| $\zeta_{CO_2}$ | CO <sub>2</sub> diffusion coefficient        | $150 \mu\text{mol} \cdot \text{mg}^{-1} \text{Chl} \cdot \text{h}^{-1}$               | (1)       |
| $Out_{CO_2}$   | CO <sub>2</sub> concentration in cytoplasm   | $4.45 \cdot 10^{-3} \mu\text{mol} \cdot \text{mg}^{-1} \text{Chl}$                    | (2)       |
| $x^{O_2}$      | O <sub>2</sub> concentration in chloroplast  | $6.8 \cdot 10^{-2} \mu\text{mol} \cdot \text{mg}^{-1} \text{Chl}$                     | (2)       |
| $\zeta_{O_2}$  | O <sub>2</sub> diffusion coefficient         | $50 \mu\text{mol} \cdot \text{mg}^{-1} \text{Chl} \cdot \text{h}^{-1}$                | (3)       |
| $Out_{O_2}$    | O <sub>2</sub> concentration in cytoplasm    | $7.2 \cdot 10^{-2} \mu\text{mol} \cdot \text{mg}^{-1} \text{Chl}$                     | (2)       |
| $x^{P_i}$      | P <sub>i</sub> concentration in chloroplast  | $0.2 \mu\text{mol} \cdot \text{mg}^{-1} \text{Chl}$                                   | (4)       |
| $\zeta_{P_i}$  | P <sub>i</sub> diffusion coefficient         | $2.4 \cdot 10^{-3} \mu\text{mol} \cdot \text{mg}^{-1} \text{Chl} \cdot \text{h}^{-1}$ | (5)       |
| $Out_{P_i}$    | P <sub>i</sub> concentration in cytoplasm    | $0.28 \mu\text{mol} \cdot \text{mg}^{-1} \text{Chl}$                                  | (4)       |
| $x^{ATP}$      | ATP concentration in chloroplast             | $6 \cdot 10^{-2} \mu\text{mol} \cdot \text{mg}^{-1} \text{Chl}$                       | (4)       |
| $x^{RuBP}$     | RuBP concentration in chloroplast            | $0.145 \mu\text{mol} \cdot \text{mg}^{-1} \text{Chl}$                                 | (4)       |
| $x^{NADPH}$    | NADPH concentration in chloroplast           | $0.02 \mu\text{mol} \cdot \text{mg}^{-1} \text{Chl}$                                  | (6)       |
| $x^{PGA}$      | PGA concentration in chloroplast             | $0.2 \mu\text{mol} \cdot \text{mg}^{-1} \text{Chl}$                                   | (4)       |
| $x^{rbCL}$     | rbCL concentration in chloroplast            | $0.068 \mu\text{mol} \cdot \text{mg}^{-1} \text{Chl}$                                 | (7)       |
| $n$            | Constant                                     | 1.2                                                                                   |           |
| $K$            | Synthesis rate of rbCL protein               | $0.12 \mu\text{mol} \cdot \text{mg}^{-1} \text{Chl} \cdot \text{h}^{-1}$              | (8)       |
| $R$            | Degradation rate of rbCL protein             | $1 \mu\text{mol} \cdot \text{mg}^{-1} \text{Chl} \cdot \text{h}^{-1}$                 | (8)       |
| $K_{L1}$       | Kinetic parameter of Rubisco                 | 80                                                                                    |           |
| $K_{L2}$       | Kinetic parameter of Rubisco                 | 40                                                                                    |           |

1. Smith EC, Griffiths H (1996) The occurrence of the chloroplast pyrenoid is correlated with the activity of a CO<sub>2</sub>-concentrating mechanism and carbon isotope discrimination in lichens and bryophytes. *Planta* 198:6–16.
2. Luttge U (2002) CO<sub>2</sub>-concentrating: Consequences in crassulacean acid metabolism. *J Exp Bot* 53:2131–2142.
3. Goyal A, Tolbert NE (1996) Association of glycolate oxidation with photosynthetic electron transport in plant and algal chloroplasts. *Proc Natl Acad Sci USA* 93:3319–3324.
4. Sharkey TD, et al. (1986) Limitation of photosynthesis by carbon metabolism. II. O<sub>2</sub>-insensitive CO<sub>2</sub> uptake results from limitation of triose phosphate utilization. *Plant Physiol* 81:1123–1129.
5. Rutter JC, Cobb AH (1983) Translocation of orthophosphate and glucose 6-phosphate in *Codium fragile* chloroplasts. *New Phytol* 95:559–568.
6. Baysdorfer C, Robinson JM (1985) Metabolic interactions between spinach leaf nitrite reductase and ferredoxin-NADP reductase: Competition for reduced ferredoxin. *Plant Physiol* 77:318–320.
7. Vu JC, Yelenosky G (1988) Water deficit and associated changes in some photosynthetic parameters in leaves of "Valencia" orange (*Citrus sinensis* L. Osbeck). *Plant Physiol* 88:375–378.
8. Takeuchi A, Yamaguchi T, Hidema J, Strid A, Kumagai T (2002) Changes in synthesis and degradation of Rubisco and LHCII with leaf age in rice (*Oryza sativa* L.) growing under supplementary UV-B radiation. *Plant Cell Environ* 25:695–706.
